# Supplementary material for: Water soluble selenometabolome of Cardamine violifolia
Source: Royal Society of Chemistry journal article supplement (doi:10.1039/d0mt00216j), 2020-10-28
Supplement: d0mt00216j2.pdf [file d0mt00216j2.pdf]

**Electronic Supplementary Information for the article entitled**

**Water soluble selenometabolome of *Cardamine violifolia***

**by**

Laurent Ouerdane<sup>a</sup>, Eszter Borbála Both<sup>b</sup>, Jiqian Xiang<sup>c</sup>, Hongqing Yin<sup>c</sup>, Yu Kang<sup>c</sup>, Shuxun Shao<sup>d</sup>,  
Katalin Kiszalák<sup>b</sup>, Zsuzsa Jókai<sup>b</sup>, Mihály Dernovics<sup>e\*</sup>

**that is published in Metallomics, DOI: 10.1039/D0MT00216J**

<sup>a</sup> Université de Pau et des Pays de l'Adour, e2s UPPA, CNRS, IPREM-UMR5254, Hélioparc, 2, Av. Pr. Angot, 64053 Pau, France

<sup>b</sup> Department of Applied Chemistry, Szent István University, Villányi út 29-43., 1118 Budapest, Hungary

<sup>c</sup> Enshi Autonomous Prefecture Academy of Agriculture Sciences, 517 Shizhou Road, Enshi, Hubei Province 445002, China

<sup>d</sup> State Key Laboratory of Ore Deposit Geochemistry, Institute of Geochemistry, Chinese Academy of Sciences, 99 Lincheng West Road, Guanshanhu District, Guiyang, Guizhou Province 550081, China

<sup>e</sup> Department of Plant Physiology, Agricultural Institute, Centre for Agricultural Research, Brunszvik u. 2., 2462 Martonvásár, Hungary

\*corresponding author

Table S1. UPLC-Unispray-QTOFMS instrumental setup parameters

| Acquity I-Class UPLC |                                                                                                                             | Vion IMS Unispray (+/-) -QTOF-MS                          |                                                       |
|----------------------|-----------------------------------------------------------------------------------------------------------------------------|-----------------------------------------------------------|-------------------------------------------------------|
| UPLC column          | Acquity BEH C <sub>18</sub> ,<br>2.1*100 mm; 1.7 μm                                                                         | Source temperature                                        | 120°C                                                 |
| Eluent "A"           | water with 0.1 v/v% formic acid                                                                                             | Desolvation temperature                                   | 550°C                                                 |
| Eluent "B"           | acetonitrile with 0.1 v/v% formic acid                                                                                      | Capillary voltage                                         | 300 V                                                 |
| Flow rate            | 0.4 ml/min                                                                                                                  | Desolvation gas                                           | 1000 L/h                                              |
| Column temperature   | 25°C                                                                                                                        | Cone gas                                                  | 100 L/h                                               |
| Gradient             | 0 – 1.0 min 10% „B”<br>1.0 – 4.0 min ↑ 80% „B”<br>4.0 – 4.5 min 80% „B”<br>4.5 – 5.0 min ↓ 10% „B”<br>5.0 – 7.0 min 10% „B” | IMS<br>MS scan<br>MS scan time<br>Lock mass<br>MS/MS scan | OFF<br>100 – 1000 m/z<br>0.2 s<br>ON<br>50 – 1000 m/z |
| Injection volume     | 3.0 μl                                                                                                                      | Low mass ramp                                             | 20 – 30 eV                                            |
| Sample temperature   | 8°C                                                                                                                         | High mass ramp                                            | 30 – 80 eV                                            |

Table S2. Effect of defect padding settings on the efficiency of automatic selenium pattern recognition.

| Fraction | m/z | Minimally required mass padding (Da) for successful detection |                             |                             |                             |
|----------|-----|---------------------------------------------------------------|-----------------------------|-----------------------------|-----------------------------|
|          |     | at 20 mDa<br>defect padding                                   | at 40 mDa<br>defect padding | at 60 mDa<br>defect padding | at 80 mDa<br>defect padding |
| #1       | 282 | >1000                                                         | 17                          | 11                          | 10                          |
|          | 284 | 89                                                            | 12                          | 11                          | 11                          |
|          | 407 | >1000                                                         | 121                         | 106                         | 71                          |
|          | 242 | 27                                                            | 21                          | 21                          | 21                          |
|          | 391 | >1000                                                         | >1000                       | 191                         | 116                         |
|          | 391 | >1000                                                         | >1000                       | 190                         | 116                         |
| #2       | 419 | >1000                                                         | 130                         | 115                         | 86                          |
|          | 581 | >1000                                                         | >1000                       | >1000                       | 437                         |
|          | 419 | >1000                                                         | 173                         | 125                         | 115                         |
|          | 401 | >1000                                                         | 120                         | 103                         | 67                          |
|          | 285 | >1000                                                         | 21                          | 13                          | 12                          |
|          | 405 | 106                                                           | 98                          | 85                          | 41                          |
|          | 285 | >1000                                                         | 21                          | 13                          | 12                          |
| #3       | 441 | 391                                                           | 138                         | 128                         | 100                         |
|          | 419 | >1000                                                         | 175                         | 125                         | 115                         |
|          | 446 | >1000                                                         | >1000                       | 457                         | 180                         |
|          | 268 | >1000                                                         | 2                           | 2                           | 2                           |
|          | 197 | 53                                                            | 52                          | 52                          | 52                          |
|          | 215 | 40                                                            | 40                          | 40                          | 39                          |
| #4       | 254 | 15                                                            | 12                          | 12                          | 12                          |
|          | 312 | 53                                                            | 33                          | 31                          | 31                          |
|          | 271 | 1                                                             | 1                           | 1                           | 1                           |
|          | 282 | >1000                                                         | 17                          | 11                          | 10                          |
|          | 284 | 89                                                            | 12                          | 11                          | 11                          |

Table S3. Efficiency of automatic selenium pattern recognition. It is to note that the compounds with detected theoretical selenium mass defect include false positive hits and the different isotopologues of the same compound as well.

| Fraction | Number of compounds detected | Number of compounds with detected theoretical selenium mass defect                    | Relative amount of compounds detected with theoretical selenium mass defect | Number of compounds with detected theoretical selenium mass defect                    | Relative amount of compounds detected with theoretical selenium mass defect |
|----------|------------------------------|---------------------------------------------------------------------------------------|-----------------------------------------------------------------------------|---------------------------------------------------------------------------------------|-----------------------------------------------------------------------------|
|          |                              | Settings:<br>defect paddig, 60 mDa; mass padding, 200 Da; minimum intensity, 2000 cps |                                                                             | Settings:<br>defect paddig, 80 mDa; mass padding, 200 Da; minimum intensity, 2000 cps |                                                                             |
| #1       | 7293                         | 350                                                                                   | 4.8%                                                                        | 457                                                                                   | 6.3%                                                                        |
| #2       | 5062                         | 227                                                                                   | 4.5%                                                                        | 277                                                                                   | 5.5%                                                                        |
| #3       | 4838                         | 229                                                                                   | 4.7%                                                                        | 269                                                                                   | 5.6%                                                                        |
| #4       | 4572                         | 178                                                                                   | 3.9%                                                                        | 206                                                                                   | 4.5%                                                                        |

Table S4. Efficiency of automatic selenium pattern recognition at optimised settings (mass padding: 200 Da; defect padding: 80 mDa). Values in bold indicate successful detection.

| FR1              |                                                | FR2              |                                                | FR3              | FR4              |                                                |
|------------------|------------------------------------------------|------------------|------------------------------------------------|------------------|------------------|------------------------------------------------|
| m/z              | background of unsuccessful automatic detection | m/z              | background of unsuccessful automatic detection | m/z              | m/z              | background of unsuccessful automatic detection |
| <b>241.99302</b> | -                                              | <b>285.05998</b> | -                                              | <b>197.00725</b> | <b>254.02883</b> | -                                              |
| 377.07037        | isobaric interference                          | 301.09063        | isobaric interference                          | <b>241.99302</b> | <b>271.02005</b> | -                                              |
| 391.08672        | isobaric interference                          | 405.06603        | low intensity                                  | <b>268.04482</b> | <b>282.06027</b> | -                                              |
| <b>407.04499</b> | -                                              | 416.08220        | low intensity                                  | <b>270.02341</b> | <b>284.03997</b> | -                                              |
| 435.04004        | low intensity                                  | <b>419.05681</b> | -                                              | <b>446.09233</b> | <b>312.03454</b> | -                                              |
| 447.11604        | low intensity                                  | 434.09228        | low intensity                                  | <b>463.02100</b> | 313.02949        | low intensity                                  |
| 448.10670        | low intensity                                  | 537.14451        | low intensity                                  |                  | <b>364.95162</b> | -                                              |
| 460.10880        | low intensity                                  | 581.10958        | low mass padding                               |                  | 444.86739        | low intensity + triple selenium                |
| 482.99120        | low intensity                                  |                  |                                                |                  | 489.05794        | low intensity                                  |
| 523.12784        | low intensity                                  |                  |                                                |                  |                  |                                                |
| 552.06109        | low intensity                                  |                  |                                                |                  |                  |                                                |
| 614.14680        | low intensity                                  |                  |                                                |                  |                  |                                                |
